# Supplementary material for: The Association Between Cognitive Performance and Speech-in-Noise Perception for Adult Listeners: A Systematic Literature Review and Meta-Analysis
Source: PubMed Central journal article supplement (PMC5734454; doi:10.1177/2331216517744675), 2017-12-14
Supplement: supp_table_2_final.pdf [file supp_table_2_final.pdf]

2a

Score: (\*, ?, ✓ or N/A)

| Risk of Bias                                                                                                                    |  |
|---------------------------------------------------------------------------------------------------------------------------------|--|
| 1. Did the authors include a sample size justification?                                                                         |  |
| 2. If any participant data is excluded from the analysis is a clear justification given?                                        |  |
| 3. Were all the outcome measures in the methods included in the results?                                                        |  |
| 4. Were there any conflicts of interest? I.e., is the study funded or conducted by a body with vested interests in the results? |  |

2b

\* = High risk of bias (not enough information to make a judgement (Q1-3) or clear conflict of interest (Q4))  
? = Unclear (incomplete information or not reported)  
✓ = Low risk of bias (appropriate use and sufficient information (Q1-3) or no conflict of interest (Q4))  
N/A = Not applicable (no participant data is excluded (Q2))

**Supplementary Table 2.**

*Checklist for risk of bias assessment. 2a: Questions assessing risk of bias; 2b: score key for all questions*
