# Supplementary material for: The Association Between Cognitive Performance and Speech-in-Noise Perception for Adult Listeners: A Systematic Literature Review and Meta-Analysis
Source: PubMed Central journal article supplement (PMC5734454; doi:10.1177/2331216517744675), 2017-12-14
Supplement: supp_table_3_final.pdf [file supp_table_3_final.pdf]

| Study Demographics                                                                                                       | Speech-in-noise Tests                                 | Cognitive Tests                                                          | Sub-domain            | Domain                 |
|--------------------------------------------------------------------------------------------------------------------------|-------------------------------------------------------|--------------------------------------------------------------------------|-----------------------|------------------------|
| (Anderson et al., 2013)<br>N=120, 55-79 years,<br>normal hearing-to-<br>moderate hearing loss<br>(HL)                    | Words in >2-talker babble<br>(non-adaptive)           | Auditory attention<br>quotient of IVA+<br>(Sandford and Turner,<br>2004) | Alerting              | Attention              |
|                                                                                                                          | Sentences in >2-talker<br>babble (non-adaptive)       | Memory for words<br>(Woodcock et al., 2001)                              | Episodic<br>memory    | Memory                 |
|                                                                                                                          | Sentences in unmodulated<br>noise (adaptive)          | Auditory working<br>memory (Woodcock et<br>al., 2001)                    | Working<br>memory     | Executive<br>processes |
| (Besser et al., 2012)<br>N=55, 18-78 years,<br>normal hearing-to-mild<br>HL                                              | Sentences in unmodulated<br>noise (adaptive)          | Reading span test<br>(Andersson et al., 2001)                            | Working<br>memory     | Executive<br>processes |
|                                                                                                                          | Sentences in modulated<br>noise (adaptive)            | Letter digit substitution<br>test (Jolles et al., 1995)                  | Processing<br>speed   | Processing<br>speed    |
| (Carroll et al., 2016)<br>N=22, 18-35 years,<br>normal hearing-to-mild<br>HL                                             | Sentences in unmodulated<br>noise (non-adaptive)      | Reading span test<br>(Carroll et al., 2015)                              | Working<br>memory     | Executive<br>processes |
|                                                                                                                          |                                                       | The Lexical decision test<br>(Carroll et al., 2016)                      | Crystalized<br>IQ     | Intelligence           |
|                                                                                                                          |                                                       | Wortschatztest<br>(Schmidt and Metzler,<br>1992)                         | Crystalized<br>IQ     | Intelligence           |
|                                                                                                                          |                                                       | Peabody vocabulary<br>test (Bell et al., 2001)                           | Crystalized<br>IQ     | Intelligence           |
| (Cervera et al., 2009)<br>N=28, 19-25 & 55-65<br>years, normal hearing-to-<br>moderate HL                                | Consonants in<br>unmodulated noise (non-<br>adaptive) | Word list recall<br>(Cervera et al., 2009)                               | Episodic<br>memory    | Memory                 |
|                                                                                                                          |                                                       | Digit ordering (Cooper<br>et al., 1991)                                  | Working<br>memory     | Executive<br>processes |
| (Ellis and Rönnberg,<br>2014)<br>N=24, age 24 (mean)<br>years (age range not<br>available), normal<br>hearing-to-mild HL | Sentences in ≤2-talker<br>babble (non-adaptive)       | Proactive interference<br>(Kane and Engle, 2000)                         | Inhibitory<br>control | Executive<br>Processes |
| (Gordon-Salant et al.,<br>2015)<br>N=24, 18-26 & 65-80<br>years, normal hearing-to-<br>moderate HL                       | Words in >2-talker babble<br>(non-adaptive)           | Digit symbol<br>substitution test<br>(Wechsler, 1997)                    | Processing<br>speed   | Processing<br>speed    |
| (Gordon-Salant and Cole,<br>2016)<br>n=53, 18-25 & 61-75<br>years, normal hearing-to-<br>mild HL                         | Words in >2-talker babble<br>(adaptive)               | Listening span test<br>(Daneman and<br>Carpenter, 1980)                  | Working<br>memory     | Executive<br>processes |
|                                                                                                                          | Sentences in >2-talker<br>babble (adaptive)           | Paced auditory serial<br>addition test (Rao et al.,<br>1989)             | Working<br>memory     | Executive<br>processes |

|                                                                                    |                                                     |                                                               |                    |                     |
|------------------------------------------------------------------------------------|-----------------------------------------------------|---------------------------------------------------------------|--------------------|---------------------|
|                                                                                    |                                                     | Reading span test (Ronnberg et al., 1989)                     | Working memory     | Executive processes |
|                                                                                    |                                                     | Letter digit substitution test (Wechsler, 1997)               | Processing speed   | Processing speed    |
| (Heinrich et al., 2015)<br>N=44, 50-74 years,<br>normal hearing-to-moderate HL     | Sentences in modulated noise (non-adaptive)         | Test of Everyday Attention subtest 6 (Robertson et al., 1994) | Orienting          | Attention           |
|                                                                                    |                                                     | Test of Everyday Attention subtest 7 (Robertson et al., 1994) | Alerting           | Attention           |
|                                                                                    |                                                     | Backward digit recall (Wechsler, 1997)                        | Working memory     | Executive processes |
|                                                                                    |                                                     | Visual letter monitoring (Gatehouse, 2003)                    | Working memory     | Executive processes |
|                                                                                    |                                                     | Reading span test (Daneman and Carpenter, 1980)               | Working memory     | Executive Processes |
|                                                                                    |                                                     | Forward digit recall (Wechsler, 1997)                         | Episodic memory    | Memory              |
|                                                                                    |                                                     | Matrix reasoning (Wechsler, 1999)                             | Fluid IQ           | Intelligence        |
|                                                                                    |                                                     |                                                               |                    |                     |
| (Heinrich and Knight, 2016)<br>N=30, 62-85 years,<br>normal hearing-to-moderate HL | Words in modulated noise (non-adaptive)             | Stroop test (Stroop, 1935)                                    | Inhibitory control | Executive processes |
|                                                                                    | Sentences in modulated noise (non-adaptive)         | Letter number sequencing (Wechsler, 1997)                     | Working memory     | Executive processes |
|                                                                                    |                                                     | Reading span test (Daneman and Carpenter, 1980)               | Working memory     | Executive processes |
|                                                                                    |                                                     | Mill hill vocabulary scale (Raven et al., 1982)               | Crystalized IQ     | Intelligence        |
|                                                                                    |                                                     | Nelson-Denny reading test (Brown et al., 1981)                | Crystalized IQ     | Intelligence        |
| (Helfer and Freyman, 2014)<br>N=30, 45-85 years,<br>normal hearing-to-moderate HL  | Sentences in $\leq 2$ -talker babble (non-adaptive) | Letter-number sequence serial recall (Gold et al., 1997)      | Episodic memory    | Memory              |
|                                                                                    | Sentences in unmodulated noise (non-adaptive)       | Letter-number sequence re-ordering (Gold et al., 1997)        | Working memory     | Executive processes |
|                                                                                    |                                                     | Connections test (Salthouse, 2000)                            | Set-shifting       | Executive processes |
|                                                                                    |                                                     | Stroop test (Jesse, 2012)                                     | Inhibitory control | Executive processes |
| (Janse, 2012)<br>N=39, 65-83 years,<br>normal hearing-to-moderate HL               | Phonemes in $\leq 2$ -talker babble (non-adaptive)  | Stroop test (Stroop, 1935)                                    | Inhibitory control | Executive processes |
| (Koelewijn et al., 2014)<br>n=32, 31-76 years,<br>normal hearing-to-moderate HL    | Sentences in unmodulated noise (adaptive)           | Stroop test (Stroop, 1935)                                    | Inhibitory control | Executive processes |
|                                                                                    | Sentences in $\leq 2$ -talker babble (adaptive)     | Listening span test (Daneman and Carpenter, 1980)             | Working memory     | Executive processes |

|                                                                                                                   |                                                                                                                                                |                                                                                         |                    |                     |
|-------------------------------------------------------------------------------------------------------------------|------------------------------------------------------------------------------------------------------------------------------------------------|-----------------------------------------------------------------------------------------|--------------------|---------------------|
|                                                                                                                   |                                                                                                                                                | Size comparison span (Sorqvist et al., 2010)                                            | Working memory     | Executive processes |
| (Meister et al., 2013a)<br>N=12, 58-79 years, normal hearing-to-mild HL                                           | Sentences in unmodulated noise (adaptive)<br><br>Sentences in modulated noise (adaptive)<br><br>Sentences in >2-talker babble (adaptive)       | Verbal learning and memory test (Helmstaedter and Durwen, 1990)                         | Episodic memory    | Memory              |
| (Meister et al., 2013b)<br>N=26, 18-27 & 58-79 years, normal hearing-to-mild HL                                   | Sentences in ≤2-talker babble (non-adaptive)                                                                                                   | Verbal learning and memory test (Helmstaedter and Durwen, 1990)                         | Episodic memory    | Memory              |
| (Parbery-Clark et al., 2009)<br>N=31, mean age 23±3 SD years (age range not available), normal hearing-to-mild HL | Sentence in unmodulated noise (adaptive)<br><br>Sentence in >2-talker babble (non-adaptive)                                                    | composite score of Auditory working memory and Numbers reversed (Woodcock et al., 2001) | Working memory     | Executive processes |
| (Parbery-Clark et al., 2011)<br>N=37, age 45-65 years, normal hearing-to-mild HL                                  | Words in >2-talker babble (non-adaptive)<br><br>Sentence in unmodulated noise (adaptive)<br><br>Sentence in >2-talker babble (non-adaptive)    | composite score of Auditory working memory and Numbers reversed (Woodcock et al., 2001) | Working memory     | Executive processes |
|                                                                                                                   |                                                                                                                                                | Colorado Assessment test: Visual working memory subtest (Davis and Keller, 1998)        | Working memory     | Executive processes |
| (Rönnerberg et al., 2014)<br>N=20, 28-42 years, normal hearing-to-mild HL                                         | Sentences in unmodulated (non-adaptive)<br><br>Sentences in modulated noise (non-adaptive)<br><br>Sentences in >2-talker babble (non-adaptive) | Reading span test (Rönnerberg et al., 1989)                                             | Working memory     | Executive processes |
|                                                                                                                   |                                                                                                                                                | Letter memory test (Morris and Jones, 1990)                                             | Working memory     | Executive processes |
|                                                                                                                   |                                                                                                                                                |                                                                                         |                    |                     |
| (Slater and Kraus, 2016)<br>N=54, 18-35 years, normal hearing-to-mild HL                                          | Sentences in >2-talker babble (non-adaptive)                                                                                                   | Auditory working memory (Woodcock et al., 2001)                                         | Working memory     | Executive processes |
| (Stenbäck et al., 2015)<br>N=36, 18-22 & 61-79 years, normal hearing-to-mild HL                                   | Sentences in modulated noise (adaptive)                                                                                                        | Auditory Hayling task (Burgess and Shallice, 1996)                                      | Inhibitory control | Executive processes |
|                                                                                                                   |                                                                                                                                                | Reading span test (Rönnerberg et al., 1989)                                             | Working memory     | Executive processes |
| (Surprenant, 2007)<br>N=75, 30-80 years, normal hearing-to-mild HL                                                | Syllables in unmodulated noise (non-adaptive)                                                                                                  | Rhyme verification task (Johnston and McDermott, 1986)                                  | Crystallized IQ    | Intelligence        |
|                                                                                                                   |                                                                                                                                                | Operation span (Unsworth et al., 2005)                                                  | Working memory     | Executive processes |

|                                                                                                                         |                                                        |                                                         |                       |                        |
|-------------------------------------------------------------------------------------------------------------------------|--------------------------------------------------------|---------------------------------------------------------|-----------------------|------------------------|
| (Tun and Wingfield, 1999)<br>N=36, 18-22 & 61-79<br>years, normal hearing-to-<br>moderate HL                            | Sentences in $\leq 2$ -talker<br>babble (non-adaptive) | Vocabulary test<br>(Wechsler, 1981)                     | Crystalized<br>IQ     | Intelligence           |
|                                                                                                                         | Sentences in $> 2$ -talker<br>babble (non-adaptive)    | Digit symbol<br>substitution test<br>(Wechsler, 1981)   | Processing<br>speed   | Processing<br>speed    |
| (Uslar et al., 2013)<br>N=20, mean age $24 \pm 2SD$<br>years (age range not<br>available), normal<br>hearing-to-mild HL | Sentences in unmodulated<br>noise (adaptive)           | word list recall<br>(Schuchardt et al.,<br>2006)        | Episodic<br>memory    | Memory                 |
| (Veneman et al., 2013)<br>N=15, 20-28 & 66-78<br>years, normal hearing-to-<br>mild HL                                   | Sentences in $> 2$ -talker<br>babble (non-adaptive)    | Visual distraction test<br>(May, 1999)                  | Inhibitory<br>control | Executive<br>processes |
| (Zekveld et al., 2011)<br>N=76, 19-31 & 46-73<br>years, normal hearing-to-<br>mild HL                                   | Sentences in unmodulated<br>noise (adaptive)           | Letter digit substitution<br>test (Jolles et al., 1995) | Processing<br>speed   | Processing<br>speed    |
|                                                                                                                         |                                                        | Word vocabulary test<br>(Snijders et al., 1983)         | Crystalized<br>IQ     | Intelligence           |
| (Zekveld et al., 2014)<br>N=24, age $22 \pm 2.8 SD$<br>years (age range not<br>available), normal<br>hearing-to-mild HL | Sentences in $\leq 2$ -talker<br>babble (adaptive)     | Reading span test<br>(Besser et al., 2013)              | Working<br>memory     | Executive<br>processes |
|                                                                                                                         |                                                        | Size comparison span<br>(Sorqvist et al., 2010)         | Working<br>memory     | Executive<br>processes |
|                                                                                                                         |                                                        | Letter memory test<br>(Morris and Jones,<br>1990)       | Working<br>memory     | Executive<br>processes |
|                                                                                                                         |                                                        | Trail making test B-A<br>difference (Reitan,<br>1958)   | Set-shifting          | Executive<br>processes |

**Supplementary Table 3.**

*Summary of included studies. Participant demographics include number of participants, age range, and Hearing Loss (HL) categorization. The identity of speech tests was characterized in terms of target stimulus (Phonemes, words, sentences) and masker ( $\leq 2$ -talker babble,  $> 2$ -babble, modulated noise, unmodulated noise). Cognitive tests lists cognitive tests used in each study.*

*SiN and cognitive tests are only included in this table if they were eligible for analysis under the criteria of this review. Allocation of tests to cognitive domains and sub-domains is described in the main text. SD=standard deviation.*
